# Supplementary material for: Do acute myocardial infarction and stroke mortality vary by distance to hospitals in Switzerland? Results from the Swiss National Cohort Study
Source: PubMed Central journal article supplement — BMJ Open. 2016 Nov 1;6(11):e013090. doi: 10.1136/bmjopen-2016-013090 (PMC5129138; doi:10.1136/bmjopen-2016-013090), 2016-11-01
Supplement: bmjopen-2016-013090supp_appendix1.pdf [file bmjopen-2016-013090supp_appendix1.pdf]

Appendix 1 Driving time quintiles by hospital type (in minutes)

| <b>Quintiles</b>              | <b>Min</b> | <b>Max</b> |
|-------------------------------|------------|------------|
| <b>Acute hospital</b>         |            |            |
| Lowest quintile               | 0.0        | 2.7        |
| Second quintile               | 2.7        | 4.5        |
| Third quintile                | 4.5        | 6.7        |
| Fourth quintile               | 6.7        | 9.8        |
| Highest quintile              | 9.8        | 64.9       |
| <b>Acute hospital with ER</b> |            |            |
| Lowest quintile               | 0.0        | 3.1        |
| Second quintile               | 3.1        | 4.9        |
| Third quintile                | 4.9        | 7.2        |
| Fourth quintile               | 7.2        | 10.3       |
| Highest quintile              | 10.3       | 64.9       |
| <b>Central hospital</b>       |            |            |
| Lowest quintile               | 0.1        | 6.2        |
| Second quintile               | 6.2        | 12.5       |
| Third quintile                | 12.5       | 19.0       |
| Fourth quintile               | 19.0       | 25.9       |
| Highest quintile              | 25.9       | 119.6      |
| <b>University hospital</b>    |            |            |
| Lowest quintile               | 0.2        | 8.4        |
| Second quintile               | 8.4        | 19.2       |
| Third quintile                | 19.2       | 29.1       |
| Fourth quintile               | 29.1       | 43.0       |
| Highest quintile              | 43.0       | 178.2      |
