# Supplementary material for: Do acute myocardial infarction and stroke mortality vary by distance to hospitals in Switzerland? Results from the Swiss National Cohort Study
Source: PubMed Central journal article supplement — BMJ Open. 2016 Nov 1;6(11):e013090. doi: 10.1136/bmjopen-2016-013090 (PMC5129138; doi:10.1136/bmjopen-2016-013090), 2016-11-01
Supplement: bmjopen-2016-013090supp_appendix2.pdf [file bmjopen-2016-013090supp_appendix2.pdf]

Appendix 2 Straight-line distance quintiles by hospital type (in meters)

| <b>Quintiles</b>              | <b>Min</b> | <b>Max</b> |
|-------------------------------|------------|------------|
| <b>Acute hospital</b>         |            |            |
| Lowest quintile               | 1          | 1,134      |
| Second quintile               | 1,134      | 2,237      |
| Third quintile                | 2,237      | 4,046      |
| Fourth quintile               | 4,046      | 6,820      |
| Highest quintile              | 6,820      | 35,812     |
| <b>Acute hospital with ER</b> |            |            |
| Lowest quintile               | 1          | 1,320      |
| Second quintile               | 1,320      | 2,580      |
| Third quintile                | 2,580      | 4,461      |
| Fourth quintile               | 4,461      | 7,341      |
| Highest quintile              | 7,341      | 35,812     |
| <b>Central hospital</b>       |            |            |
| Lowest quintile               | 31         | 3,775      |
| Second quintile               | 3,775      | 10,437     |
| Third quintile                | 10,437     | 18,369     |
| Fourth quintile               | 18,369     | 26,598     |
| Highest quintile              | 26,598     | 84,416     |
| <b>University hospital</b>    |            |            |
| Lowest quintile               | 57         | 5,898      |
| Second quintile               | 5,898      | 19,572     |
| Third quintile                | 19,572     | 31,540     |
| Fourth quintile               | 31,540     | 47,325     |
| Highest quintile              | 47,325     | 176,256    |
