# Supplementary material for: Do acute myocardial infarction and stroke mortality vary by distance to hospitals in Switzerland? Results from the Swiss National Cohort Study
Source: PubMed Central journal article supplement — BMJ Open. 2016 Nov 1;6(11):e013090. doi: 10.1136/bmjopen-2016-013090 (PMC5129138; doi:10.1136/bmjopen-2016-013090), 2016-11-01
Supplement: bmjopen-2016-013090supp_appendix4.pdf [file bmjopen-2016-013090supp_appendix4.pdf]

Appendix 4 Number of persons in the SNC by driving time for the four different hospital types and average driving time

| Driving time                  | Average driving time | SNC persons |      |
|-------------------------------|----------------------|-------------|------|
|                               | in min (max)         | Number      | in % |
| <b>Acute hospital</b>         | <b>6.5 (65)</b>      |             |      |
| <5min                         |                      | 2,017,352   | 44.9 |
| 5 < 10min                     |                      | 1,610,354   | 35.9 |
| 10 < 15min                    |                      | 674,382     | 15.0 |
| 15 < 20min                    |                      | 132,161     | 2.9  |
| 20min+                        |                      | 56,190      | 1.3  |
| <b>Acute hospital with ER</b> | <b>7 (65)</b>        |             |      |
| <5min                         |                      | 1,834,768   | 40.9 |
| 5 < 10min                     |                      | 1,672,327   | 37.2 |
| 10 < 15min                    |                      | 747,662     | 16.7 |
| 15 < 20min                    |                      | 162,452     | 3.6  |
| 20min+                        |                      | 73,230      | 1.6  |
| <b>Central hospital</b>       | <b>17.4 (119.6)</b>  |             |      |
| <5min                         |                      | 679,954     | 15.1 |
| 5 < 10min                     |                      | 795,805     | 17.7 |
| 10 < 15min                    |                      | 619,898     | 13.8 |
| 15 < 20min                    |                      | 755,915     | 16.8 |
| 20min+                        |                      | 1,638,867   | 36.5 |
| <b>University hospital</b>    | <b>29.7 (178.2)</b>  |             |      |
| <5min                         |                      | 502,197     | 11.2 |
| 5 < 10min                     |                      | 548,417     | 12.2 |
| 10 < 15min                    |                      | 372,887     | 8.3  |
| 15 < 20min                    |                      | 454,895     | 10.1 |
| 20min+                        |                      | 2,612,043   | 58.2 |
