# Supplementary material for: Do acute myocardial infarction and stroke mortality vary by distance to hospitals in Switzerland? Results from the Swiss National Cohort Study
Source: PubMed Central journal article supplement — BMJ Open. 2016 Nov 1;6(11):e013090. doi: 10.1136/bmjopen-2016-013090 (PMC5129138; doi:10.1136/bmjopen-2016-013090), 2016-11-01
Supplement: bmjopen-2016-013090supp_appendix5.pdf [file bmjopen-2016-013090supp_appendix5.pdf]

Appendix 5 Number of persons in the SNC by straight-line distance for the four different hospital types and average straight-line distance

| Straight-line distance        | Average straight-line distance | SNC persons |      |
|-------------------------------|--------------------------------|-------------|------|
|                               | in km (max)                    | Number      | in % |
| <b>Acute hospital</b>         | <b>4.1 (35.8)</b>              |             |      |
| <5km                          |                                | 3,066,120   | 68.3 |
| 5 < 10km                      |                                | 1,146,168   | 25.5 |
| 10 < 15km                     |                                | 231,432     | 5.2  |
| 15 < 20km                     |                                | 33,091      | 0.7  |
| 20km+                         |                                | 13,628      | 0.3  |
| <b>Acute hospital with ER</b> | <b>4.5 (35.8)</b>              |             |      |
| <5km                          |                                | 2,909,789   | 64.8 |
| 5 < 10km                      |                                | 1,222,016   | 27.2 |
| 10 < 15km                     |                                | 290,970     | 6.5  |
| 15 < 20km                     |                                | 52,108      | 1.2  |
| 20km+                         |                                | 15,556      | 0.3  |
| <b>Central hospital</b>       | <b>16.1 (84.4)</b>             |             |      |
| <5km                          |                                | 1,122,167   | 25.0 |
| 5 < 10km                      |                                | 623,079     | 13.9 |
| 10 < 15km                     |                                | 556,787     | 12.4 |
| 15 < 20km                     |                                | 630,307     | 14.0 |
| 20km+                         |                                | 1,558,099   | 34.7 |
| <b>University hospital</b>    | <b>33.4 (176.3)</b>            |             |      |
| <5km                          |                                | 794,125     | 17.7 |
| 5 < 10km                      |                                | 411,948     | 9.2  |
| 10 < 15km                     |                                | 283,952     | 6.3  |
| 15 < 20km                     |                                | 349,764     | 7.8  |
| 20km+                         |                                | 2,650,650   | 59.0 |
