# Supplementary material for: Do acute myocardial infarction and stroke mortality vary by distance to hospitals in Switzerland? Results from the Swiss National Cohort Study
Source: PubMed Central journal article supplement — BMJ Open. 2016 Nov 1;6(11):e013090. doi: 10.1136/bmjopen-2016-013090 (PMC5129138; doi:10.1136/bmjopen-2016-013090), 2016-11-01
Supplement: bmjopen-2016-013090supp_appendix6.pdf [file bmjopen-2016-013090supp_appendix6.pdf]

Appendix 6 Results of the Cox proportional hazard model analyses of AMI mortality - driving time quintiles for female persons 30-64 years under models 1 to 3 for the four different hospital types

| Driving time                  | Model 1      |                | Model 2      |                | Model 3      |                |
|-------------------------------|--------------|----------------|--------------|----------------|--------------|----------------|
|                               | Hazard ratio | 95% CI         | Hazard ratio | 95% CI         | Hazard ratio | 95% CI         |
| <b>Acute hospital</b>         |              | <b>p=0.070</b> |              | <b>p=0.152</b> |              | <b>p=0.428</b> |
| Lowest quintile               | 1            |                | 1            |                | 1            |                |
| Second quintile               | 1.004        | 0.802 - 1.256  | 1.004        | 0.802 - 1.258  | 0.999        | 0.797 - 1.252  |
| Third quintile                | 0.824        | 0.652 - 1.042  | 0.832        | 0.657 - 1.054  | 0.839        | 0.655 - 1.074  |
| Fourth quintile               | 0.871        | 0.691 - 1.098  | 0.878        | 0.693 - 1.111  | 0.877        | 0.680 - 1.132  |
| Highest quintile              | 1.117        | 0.896 - 1.391  | 1.084        | 0.865 - 1.358  | 1.011        | 0.781 - 1.309  |
| <b>Acute hospital with ER</b> |              | <b>p=0.331</b> |              | <b>p=0.535</b> |              | <b>p=0.914</b> |
| Lowest quintile               | 1            |                | 1            |                | 1            |                |
| Second quintile               | 0.966        | 0.770 - 1.214  | 0.971        | 0.773 - 1.221  | 0.967        | 0.769 - 1.216  |
| Third quintile                | 0.912        | 0.725 - 1.146  | 0.930        | 0.739 - 1.172  | 0.949        | 0.746 - 1.207  |
| Fourth quintile               | 0.884        | 0.701 - 1.115  | 0.899        | 0.710 - 1.138  | 0.904        | 0.703 - 1.163  |
| Highest quintile              | 1.104        | 0.885 - 1.378  | 1.085        | 0.865 - 1.360  | 1.005        | 0.778 - 1.296  |
| <b>Central hospital</b>       |              | <b>p=0.070</b> |              | <b>p=0.189</b> |              | <b>p=0.579</b> |
| Lowest quintile               | 1            |                | 1            |                | 1            |                |
| Second quintile               | 0.853        | 0.670 - 1.085  | 0.886        | 0.694 - 1.131  | 0.936        | 0.716 - 1.223  |
| Third quintile                | 1.086        | 0.863 - 1.367  | 1.101        | 0.870 - 1.395  | 1.121        | 0.862 - 1.459  |
| Fourth quintile               | 1.133        | 0.902 - 1.424  | 1.139        | 0.900 - 1.442  | 1.101        | 0.851 - 1.424  |
| Highest quintile              | 1.164        | 0.927 - 1.461  | 1.136        | 0.897 - 1.437  | 1.020        | 0.778 - 1.338  |
| <b>University hospital</b>    |              | <b>p=0.003</b> |              | <b>p=0.059</b> |              | <b>p=0.586</b> |
| Lowest quintile               | 1            |                | 1            |                | 1            |                |
| Second quintile               | 1.012        | 0.790 - 1.295  | 1.051        | 0.817 - 1.352  | 1.120        | 0.854 - 1.467  |
| Third quintile                | 1.259        | 0.991 - 1.598  | 1.231        | 0.962 - 1.575  | 1.190        | 0.920 - 1.540  |
| Fourth quintile               | 1.427        | 1.130 - 1.802  | 1.342        | 1.055 - 1.709  | 1.241        | 0.955 - 1.611  |
| Highest quintile              | 1.355        | 1.072 - 1.713  | 1.327        | 1.027 - 1.714  | 1.166        | 0.882 - 1.543  |
