# Supplementary material for: Do acute myocardial infarction and stroke mortality vary by distance to hospitals in Switzerland? Results from the Swiss National Cohort Study
Source: PubMed Central journal article supplement — BMJ Open. 2016 Nov 1;6(11):e013090. doi: 10.1136/bmjopen-2016-013090 (PMC5129138; doi:10.1136/bmjopen-2016-013090), 2016-11-01
Supplement: bmjopen-2016-013090supp_appendix7.pdf [file bmjopen-2016-013090supp_appendix7.pdf]

Appendix 7 Results of the Cox proportional hazard model analyses of AMI mortality - driving time quintiles for male persons 30-64 years under models 1 to 3 for the four different hospital types

| Driving time                  | Model 1      |                   | Model 2      |                   | Model 3      |                |
|-------------------------------|--------------|-------------------|--------------|-------------------|--------------|----------------|
|                               | Hazard ratio | 95% CI            | Hazard ratio | 95% CI            | Hazard ratio | 95% CI         |
| <b>Acute hospital</b>         |              | <b>p=0.012</b>    |              | <b>p=0.041</b>    |              | <b>p=0.144</b> |
| Lowest quintile               | 1            |                   | 1            |                   | 1            |                |
| Second quintile               | 0.946        | 0.847 - 1.057     | 0.941        | 0.842 - 1.052     | 0.950        | 0.850 - 1.063  |
| Third quintile                | 0.875        | 0.782 - 0.978     | 0.881        | 0.787 - 0.985     | 0.912        | 0.810 - 1.026  |
| Fourth quintile               | 1.007        | 0.905 - 1.121     | 1.010        | 0.906 - 1.126     | 1.045        | 0.927 - 1.177  |
| Highest quintile              | 1.048        | 0.943 - 1.166     | 1.021        | 0.916 - 1.138     | 0.985        | 0.870 - 1.115  |
| <b>Acute hospital with ER</b> |              | <b>p=0.002</b>    |              | <b>p=0.007</b>    |              | <b>p=0.013</b> |
| Lowest quintile               | 1            |                   | 1            |                   | 1            |                |
| Second quintile               | 0.904        | 0.808 - 1.010     | 0.902        | 0.806 - 1.008     | 0.908        | 0.812 - 1.015  |
| Third quintile                | 0.864        | 0.773 - 0.965     | 0.877        | 0.784 - 0.980     | 0.910        | 0.810 - 1.023  |
| Fourth quintile               | 1.026        | 0.923 - 1.141     | 1.036        | 0.931 - 1.153     | 1.070        | 0.952 - 1.201  |
| Highest quintile              | 1.023        | 0.920 - 1.138     | 1.004        | 0.901 - 1.118     | 0.962        | 0.852 - 1.087  |
| <b>Central hospital</b>       |              | <b>p&lt;0.001</b> |              | <b>p&lt;0.001</b> |              | <b>p=0.003</b> |
| Lowest quintile               | 1            |                   | 1            |                   | 1            |                |
| Second quintile               | 0.993        | 0.885 - 1.115     | 1.027        | 0.914 - 1.154     | 1.133        | 0.996 - 1.289  |
| Third quintile                | 1.161        | 1.039 - 1.298     | 1.183        | 1.056 - 1.326     | 1.259        | 1.108 - 1.430  |
| Fourth quintile               | 1.204        | 1.077 - 1.346     | 1.221        | 1.090 - 1.368     | 1.231        | 1.086 - 1.395  |
| Highest quintile              | 1.194        | 1.067 - 1.335     | 1.180        | 1.053 - 1.324     | 1.135        | 0.994 - 1.295  |
| <b>University hospital</b>    |              | <b>p&lt;0.001</b> |              | <b>p&lt;0.001</b> |              | <b>p=0.002</b> |
| Lowest quintile               | 1            |                   | 1            |                   | 1            |                |
| Second quintile               | 1.040        | 0.925 - 1.169     | 1.071        | 0.950 - 1.207     | 1.149        | 1.010 - 1.307  |
| Third quintile                | 1.257        | 1.122 - 1.408     | 1.258        | 1.120 - 1.414     | 1.241        | 1.098 - 1.403  |
| Fourth quintile               | 1.304        | 1.164 - 1.460     | 1.280        | 1.140 - 1.438     | 1.230        | 1.084 - 1.396  |
| Highest quintile              | 1.363        | 1.219 - 1.525     | 1.385        | 1.227 - 1.563     | 1.292        | 1.131 - 1.476  |
