# Supplementary material for: Do acute myocardial infarction and stroke mortality vary by distance to hospitals in Switzerland? Results from the Swiss National Cohort Study
Source: PubMed Central journal article supplement — BMJ Open. 2016 Nov 1;6(11):e013090. doi: 10.1136/bmjopen-2016-013090 (PMC5129138; doi:10.1136/bmjopen-2016-013090), 2016-11-01
Supplement: bmjopen-2016-013090supp_appendix8.pdf [file bmjopen-2016-013090supp_appendix8.pdf]

Appendix 8 Results of the Cox proportional hazard model analyses of AMI mortality - driving time quintiles for female persons 65 and older under models 1 to 3 for the four different hospital types

| Driving time                  | Model 1      |                   | Model 2      |                | Model 3      |                |
|-------------------------------|--------------|-------------------|--------------|----------------|--------------|----------------|
|                               | Hazard ratio | 95% CI            | Hazard ratio | 95% CI         | Hazard ratio | 95% CI         |
| <b>Acute hospital</b>         |              | <b>p=0.005</b>    |              | <b>p=0.066</b> |              | <b>p=0.080</b> |
| Lowest quintile               | 1            |                   | 1            |                | 1            |                |
| Second quintile               | 1.061        | 0.991 - 1.136     | 1.054        | 0.984 - 1.129  | 1.049        | 0.979 - 1.124  |
| Third quintile                | 1.058        | 0.985 - 1.138     | 1.039        | 0.966 - 1.117  | 1.030        | 0.955 - 1.112  |
| Fourth quintile               | 1.152        | 1.071 - 1.239     | 1.115        | 1.035 - 1.202  | 1.099        | 1.013 - 1.192  |
| Highest quintile              | 1.083        | 1.007 - 1.164     | 1.029        | 0.956 - 1.108  | 0.993        | 0.911 - 1.082  |
| <b>Acute hospital with ER</b> |              | <b>p=0.108</b>    |              | <b>p=0.576</b> |              | <b>p=0.595</b> |
| Lowest quintile               | 1            |                   | 1            |                | 1            |                |
| Second quintile               | 1.036        | 0.967 - 1.109     | 1.028        | 0.960 - 1.101  | 1.019        | 0.951 - 1.092  |
| Third quintile                | 1.027        | 0.955 - 1.105     | 1.011        | 0.940 - 1.088  | 0.996        | 0.923 - 1.076  |
| Fourth quintile               | 1.098        | 1.020 - 1.182     | 1.064        | 0.987 - 1.146  | 1.038        | 0.958 - 1.125  |
| Highest quintile              | 1.072        | 0.998 - 1.152     | 1.020        | 0.949 - 1.097  | 0.974        | 0.896 - 1.059  |
| <b>Central hospital</b>       |              | <b>p&lt;0.001</b> |              | <b>p=0.002</b> |              | <b>p=0.040</b> |
| Lowest quintile               | 1            |                   | 1            |                | 1            |                |
| Second quintile               | 0.956        | 0.888 - 1.030     | 0.943        | 0.875 - 1.016  | 0.922        | 0.849 - 1.001  |
| Third quintile                | 1.059        | 0.983 - 1.140     | 1.021        | 0.947 - 1.100  | 0.990        | 0.911 - 1.076  |
| Fourth quintile               | 1.084        | 1.010 - 1.163     | 1.041        | 0.968 - 1.119  | 1.011        | 0.933 - 1.094  |
| Highest quintile              | 1.151        | 1.076 - 1.232     | 1.098        | 1.025 - 1.177  | 1.057        | 0.973 - 1.148  |
| <b>University hospital</b>    |              | <b>p&lt;0.001</b> |              | <b>p=0.001</b> |              | <b>p=0.085</b> |
| Lowest quintile               | 1            |                   | 1            |                | 1            |                |
| Second quintile               | 1.101        | 1.020 - 1.188     | 1.081        | 1.001 - 1.168  | 1.082        | 0.996 - 1.176  |
| Third quintile                | 1.114        | 1.035 - 1.200     | 1.066        | 0.989 - 1.150  | 1.040        | 0.961 - 1.127  |
| Fourth quintile               | 1.194        | 1.113 - 1.281     | 1.142        | 1.062 - 1.227  | 1.106        | 1.022 - 1.197  |
| Highest quintile              | 1.188        | 1.109 - 1.273     | 1.144        | 1.060 - 1.236  | 1.098        | 1.008 - 1.196  |
