# Supplementary material for: Do acute myocardial infarction and stroke mortality vary by distance to hospitals in Switzerland? Results from the Swiss National Cohort Study
Source: PubMed Central journal article supplement — BMJ Open. 2016 Nov 1;6(11):e013090. doi: 10.1136/bmjopen-2016-013090 (PMC5129138; doi:10.1136/bmjopen-2016-013090), 2016-11-01
Supplement: bmjopen-2016-013090supp_appendix9.pdf [file bmjopen-2016-013090supp_appendix9.pdf]

Appendix 9 Results of the Cox proportional hazard model analyses of AMI mortality - driving time quintiles for male persons 65 and older under models 1 to 3 for the four different hospital types

| Driving time                  | Model 1      |                   | Model 2      |                   | Model 3      |                   |
|-------------------------------|--------------|-------------------|--------------|-------------------|--------------|-------------------|
|                               | Hazard ratio | 95% CI            | Hazard ratio | 95% CI            | Hazard ratio | 95% CI            |
| <b>Acute hospital</b>         |              | <b>p&lt;0.001</b> |              | <b>p=0.019</b>    |              | <b>p=0.045</b>    |
| Lowest quintile               | 1            |                   | 1            |                   | 1            |                   |
| Second quintile               | 1.091        | 1.018 - 1.169     | 1.070        | 0.998 - 1.147     | 1.074        | 1.001 - 1.151     |
| Third quintile                | 1.128        | 1.052 - 1.209     | 1.089        | 1.015 - 1.168     | 1.102        | 1.024 - 1.186     |
| Fourth quintile               | 1.166        | 1.087 - 1.251     | 1.104        | 1.028 - 1.185     | 1.117        | 1.033 - 1.207     |
| Highest quintile              | 1.212        | 1.132 - 1.297     | 1.118        | 1.043 - 1.198     | 1.102        | 1.017 - 1.195     |
| <b>Acute hospital with ER</b> |              | <b>p&lt;0.001</b> |              | <b>p=0.008</b>    |              | <b>p=0.080</b>    |
| Lowest quintile               | 1            |                   | 1            |                   | 1            |                   |
| Second quintile               | 1.084        | 1.012 - 1.162     | 1.069        | 0.998 - 1.145     | 1.066        | 0.995 - 1.143     |
| Third quintile                | 1.088        | 1.014 - 1.167     | 1.061        | 0.988 - 1.138     | 1.069        | 0.993 - 1.150     |
| Fourth quintile               | 1.144        | 1.066 - 1.227     | 1.091        | 1.016 - 1.171     | 1.097        | 1.016 - 1.184     |
| Highest quintile              | 1.216        | 1.136 - 1.301     | 1.135        | 1.059 - 1.215     | 1.113        | 1.029 - 1.204     |
| <b>Central hospital</b>       |              | <b>p&lt;0.001</b> |              | <b>p&lt;0.001</b> |              | <b>p=0.102</b>    |
| Lowest quintile               | 1            |                   | 1            |                   | 1            |                   |
| Second quintile               | 1.075        | 1.001 - 1.153     | 1.050        | 0.978 - 1.128     | 1.071        | 0.991 - 1.158     |
| Third quintile                | 1.110        | 1.033 - 1.192     | 1.054        | 0.980 - 1.133     | 1.054        | 0.972 - 1.143     |
| Fourth quintile               | 1.172        | 1.094 - 1.256     | 1.108        | 1.033 - 1.189     | 1.089        | 1.008 - 1.177     |
| Highest quintile              | 1.226        | 1.147 - 1.310     | 1.152        | 1.076 - 1.233     | 1.113        | 1.027 - 1.207     |
| <b>University hospital</b>    |              | <b>p&lt;0.001</b> |              | <b>p&lt;0.001</b> |              | <b>p&lt;0.001</b> |
| Lowest quintile               | 1            |                   | 1            |                   | 1            |                   |
| Second quintile               | 1.090        | 1.012 - 1.173     | 1.065        | 0.988 - 1.147     | 1.082        | 0.999 - 1.172     |
| Third quintile                | 1.214        | 1.131 - 1.303     | 1.136        | 1.057 - 1.221     | 1.113        | 1.031 - 1.201     |
| Fourth quintile               | 1.269        | 1.185 - 1.359     | 1.182        | 1.102 - 1.268     | 1.148        | 1.064 - 1.240     |
| Highest quintile              | 1.315        | 1.230 - 1.407     | 1.248        | 1.159 - 1.343     | 1.199        | 1.104 - 1.301     |
