# Supplementary material for: Do acute myocardial infarction and stroke mortality vary by distance to hospitals in Switzerland? Results from the Swiss National Cohort Study
Source: PubMed Central journal article supplement — BMJ Open. 2016 Nov 1;6(11):e013090. doi: 10.1136/bmjopen-2016-013090 (PMC5129138; doi:10.1136/bmjopen-2016-013090), 2016-11-01
Supplement: bmjopen-2016-013090supp_appendix10.pdf [file bmjopen-2016-013090supp_appendix10.pdf]

Appendix 10 Results of the Cox proportional hazard model analyses of stroke mortality - driving time quintiles for female persons 30-64 years under models 1 to 3 for the four different hospital types

| Driving time                  | Model 1      |                | Model 2      |                | Model 3      |                |
|-------------------------------|--------------|----------------|--------------|----------------|--------------|----------------|
|                               | Hazard ratio | 95% CI         | Hazard ratio | 95% CI         | Hazard ratio | 95% CI         |
| <b>Acute hospital</b>         |              | <b>p=0.121</b> |              | <b>p=0.098</b> |              | <b>p=0.047</b> |
| Lowest quintile               | 1            |                | 1            |                | 1            |                |
| Second quintile               | 1.134        | 0.919 - 1.399  | 1.142        | 0.925 - 1.410  | 1.161        | 0.940 - 1.436  |
| Third quintile                | 0.978        | 0.788 - 1.213  | 0.996        | 0.800 - 1.239  | 1.049        | 0.834 - 1.318  |
| Fourth quintile               | 1.247        | 1.017 - 1.530  | 1.273        | 1.033 - 1.569  | 1.360        | 1.082 - 1.710  |
| Highest quintile              | 1.096        | 0.886 - 1.356  | 1.078        | 0.867 - 1.340  | 1.116        | 0.871 - 1.429  |
| <b>Acute hospital with ER</b> |              | <b>p=0.137</b> |              | <b>p=0.106</b> |              | <b>p=0.037</b> |
| Lowest quintile               | 1            |                | 1            |                | 1            |                |
| Second quintile               | 1.091        | 0.881 - 1.352  | 1.096        | 0.884 - 1.358  | 1.114        | 0.898 - 1.381  |
| Third quintile                | 1.050        | 0.847 - 1.300  | 1.073        | 0.865 - 1.331  | 1.137        | 0.908 - 1.425  |
| Fourth quintile               | 1.286        | 1.048 - 1.579  | 1.312        | 1.065 - 1.616  | 1.411        | 1.126 - 1.768  |
| Highest quintile              | 1.126        | 0.910 - 1.393  | 1.107        | 0.891 - 1.376  | 1.152        | 0.903 - 1.470  |
| <b>Central hospital</b>       |              | <b>p=0.980</b> |              | <b>p=0.960</b> |              | <b>p=0.821</b> |
| Lowest quintile               | 1            |                | 1            |                | 1            |                |
| Second quintile               | 0.941        | 0.766 - 1.157  | 0.964        | 0.782 - 1.188  | 1.002        | 0.795 - 1.264  |
| Third quintile                | 0.983        | 0.800 - 1.208  | 0.985        | 0.797 - 1.218  | 1.003        | 0.791 - 1.271  |
| Fourth quintile               | 0.997        | 0.811 - 1.225  | 0.973        | 0.787 - 1.204  | 0.968        | 0.767 - 1.221  |
| Highest quintile              | 0.987        | 0.802 - 1.215  | 0.923        | 0.745 - 1.144  | 0.886        | 0.691 - 1.136  |
| <b>University hospital</b>    |              | <b>p=0.205</b> |              | <b>p=0.471</b> |              | <b>p=0.532</b> |
| Lowest quintile               | 1            |                | 1            |                | 1            |                |
| Second quintile               | 0.963        | 0.779 - 1.191  | 0.981        | 0.790 - 1.218  | 1.021        | 0.809 - 1.289  |
| Third quintile                | 1.058        | 0.858 - 1.306  | 1.029        | 0.828 - 1.278  | 1.036        | 0.825 - 1.301  |
| Fourth quintile               | 1.215        | 0.990 - 1.490  | 1.156        | 0.936 - 1.429  | 1.150        | 0.913 - 1.449  |
| Highest quintile              | 1.062        | 0.861 - 1.310  | 0.980        | 0.775 - 1.241  | 0.959        | 0.742 - 1.240  |
