# Supplementary material for: Do acute myocardial infarction and stroke mortality vary by distance to hospitals in Switzerland? Results from the Swiss National Cohort Study
Source: PubMed Central journal article supplement — BMJ Open. 2016 Nov 1;6(11):e013090. doi: 10.1136/bmjopen-2016-013090 (PMC5129138; doi:10.1136/bmjopen-2016-013090), 2016-11-01
Supplement: bmjopen-2016-013090supp_appendix11.pdf [file bmjopen-2016-013090supp_appendix11.pdf]

Appendix 11 Results of the Cox proportional hazard model analyses of stroke mortality - driving time quintiles for male persons 30-64 years under models 1 to 3 for the four different hospital types

| Driving time                  | Model 1      |                | Model 2      |                | Model 3      |                |
|-------------------------------|--------------|----------------|--------------|----------------|--------------|----------------|
|                               | Hazard ratio | 95% CI         | Hazard ratio | 95% CI         | Hazard ratio | 95% CI         |
| <b>Acute hospital</b>         |              | <b>p=0.152</b> |              | <b>p=0.518</b> |              | <b>p=0.657</b> |
| Lowest quintile               | 1            |                | 1            |                | 1            |                |
| Second quintile               | 0.908        | 0.759 - 1.087  | 0.924        | 0.772 - 1.106  | 0.920        | 0.768 - 1.102  |
| Third quintile                | 0.881        | 0.737 - 1.053  | 0.931        | 0.777 - 1.114  | 0.934        | 0.773 - 1.129  |
| Fourth quintile               | 0.790        | 0.659 - 0.948  | 0.846        | 0.703 - 1.018  | 0.858        | 0.702 - 1.049  |
| Highest quintile              | 0.920        | 0.772 - 1.097  | 0.945        | 0.790 - 1.131  | 0.939        | 0.764 - 1.155  |
| <b>Acute hospital with ER</b> |              | <b>p=0.458</b> |              | <b>p=0.779</b> |              | <b>p=0.770</b> |
| Lowest quintile               | 1            |                | 1            |                | 1            |                |
| Second quintile               | 0.920        | 0.768 - 1.101  | 0.931        | 0.777 - 1.115  | 0.925        | 0.772 - 1.108  |
| Third quintile                | 0.840        | 0.700 - 1.007  | 0.889        | 0.740 - 1.067  | 0.899        | 0.742 - 1.089  |
| Fourth quintile               | 0.900        | 0.754 - 1.074  | 0.961        | 0.803 - 1.150  | 0.979        | 0.806 - 1.188  |
| Highest quintile              | 0.911        | 0.763 - 1.089  | 0.933        | 0.778 - 1.117  | 0.924        | 0.753 - 1.133  |
| <b>Central hospital</b>       |              | <b>p=0.026</b> |              | <b>p=0.099</b> |              | <b>p=0.196</b> |
| Lowest quintile               | 1            |                | 1            |                | 1            |                |
| Second quintile               | 0.852        | 0.705 - 1.028  | 0.930        | 0.769 - 1.126  | 0.965        | 0.782 - 1.191  |
| Third quintile                | 0.927        | 0.771 - 1.116  | 1.006        | 0.833 - 1.215  | 1.042        | 0.845 - 1.286  |
| Fourth quintile               | 1.116        | 0.934 - 1.334  | 1.183        | 0.985 - 1.421  | 1.199        | 0.981 - 1.465  |
| Highest quintile              | 1.061        | 0.886 - 1.271  | 1.077        | 0.894 - 1.296  | 1.065        | 0.860 - 1.318  |
| <b>University hospital</b>    |              | <b>p=0.044</b> |              | <b>p=0.072</b> |              | <b>p=0.208</b> |
| Lowest quintile               | 1            |                | 1            |                | 1            |                |
| Second quintile               | 1.000        | 0.826 - 1.211  | 1.100        | 0.904 - 1.337  | 1.168        | 0.947 - 1.440  |
| Third quintile                | 1.188        | 0.987 - 1.430  | 1.275        | 1.054 - 1.543  | 1.277        | 1.045 - 1.560  |
| Fourth quintile               | 1.170        | 0.970 - 1.411  | 1.226        | 1.011 - 1.486  | 1.209        | 0.981 - 1.489  |
| Highest quintile              | 1.247        | 1.037 - 1.499  | 1.258        | 1.027 - 1.541  | 1.208        | 0.968 - 1.507  |
