# Supplementary material for: Do acute myocardial infarction and stroke mortality vary by distance to hospitals in Switzerland? Results from the Swiss National Cohort Study
Source: PubMed Central journal article supplement — BMJ Open. 2016 Nov 1;6(11):e013090. doi: 10.1136/bmjopen-2016-013090 (PMC5129138; doi:10.1136/bmjopen-2016-013090), 2016-11-01
Supplement: bmjopen-2016-013090supp_appendix12.pdf [file bmjopen-2016-013090supp_appendix12.pdf]

Appendix 12 Results of the Cox proportional hazard model analyses of stroke mortality - driving time quintiles for female persons 65 and older under models 1 to 3 for the four different hospital types

| Driving time                  | Model 1      |                   | Model 2      |                   | Model 3      |                   |
|-------------------------------|--------------|-------------------|--------------|-------------------|--------------|-------------------|
|                               | Hazard ratio | 95% CI            | Hazard ratio | 95% CI            | Hazard ratio | 95% CI            |
| <b>Acute hospital</b>         |              | <b>p=0.004</b>    |              | <b>p=0.389</b>    |              | <b>p=0.441</b>    |
| Lowest quintile               | 1            |                   | 1            |                   | 1            |                   |
| Second quintile               | 1.023        | 0.970 - 1.079     | 1.001        | 0.949 - 1.056     | 0.999        | 0.947 - 1.054     |
| Third quintile                | 1.096        | 1.037 - 1.159     | 1.051        | 0.994 - 1.112     | 1.049        | 0.990 - 1.113     |
| Fourth quintile               | 1.085        | 1.024 - 1.150     | 1.021        | 0.963 - 1.083     | 1.020        | 0.957 - 1.088     |
| Highest quintile              | 1.067        | 1.009 - 1.128     | 1.003        | 0.947 - 1.062     | 1.001        | 0.936 - 1.071     |
| <b>Acute hospital with ER</b> |              | <b>p=0.003</b>    |              | <b>p=0.165</b>    |              | <b>p=0.162</b>    |
| Lowest quintile               | 1            |                   | 1            |                   | 1            |                   |
| Second quintile               | 0.997        | 0.945 - 1.052     | 0.986        | 0.934 - 1.040     | 0.982        | 0.931 - 1.037     |
| Third quintile                | 1.070        | 1.012 - 1.131     | 1.039        | 0.982 - 1.099     | 1.038        | 0.979 - 1.101     |
| Fourth quintile               | 1.095        | 1.034 - 1.160     | 1.043        | 0.984 - 1.105     | 1.042        | 0.978 - 1.109     |
| Highest quintile              | 1.036        | 0.979 - 1.095     | 0.988        | 0.933 - 1.045     | 0.983        | 0.920 - 1.050     |
| <b>Central hospital</b>       |              | <b>p&lt;0.001</b> |              | <b>p&lt;0.001</b> |              | <b>p&lt;0.001</b> |
| Lowest quintile               | 1            |                   | 1            |                   | 1            |                   |
| Second quintile               | 1.076        | 1.017 - 1.139     | 1.040        | 0.982 - 1.102     | 1.054        | 0.989 - 1.123     |
| Third quintile                | 1.128        | 1.065 - 1.195     | 1.075        | 1.014 - 1.140     | 1.096        | 1.027 - 1.170     |
| Fourth quintile               | 1.181        | 1.119 - 1.248     | 1.146        | 1.084 - 1.212     | 1.168        | 1.098 - 1.242     |
| Highest quintile              | 1.096        | 1.038 - 1.157     | 1.077        | 1.019 - 1.138     | 1.105        | 1.035 - 1.180     |
| <b>University hospital</b>    |              | <b>p&lt;0.001</b> |              | <b>p&lt;0.001</b> |              | <b>p&lt;0.001</b> |
| Lowest quintile               | 1            |                   | 1            |                   | 1            |                   |
| Second quintile               | 1.135        | 1.070 - 1.203     | 1.090        | 1.027 - 1.157     | 1.104        | 1.036 - 1.177     |
| Third quintile                | 1.239        | 1.172 - 1.310     | 1.168        | 1.103 - 1.236     | 1.171        | 1.102 - 1.244     |
| Fourth quintile               | 1.128        | 1.067 - 1.192     | 1.068        | 1.009 - 1.131     | 1.072        | 1.007 - 1.141     |
| Highest quintile              | 1.077        | 1.019 - 1.138     | 1.062        | 0.999 - 1.129     | 1.061        | 0.992 - 1.136     |
