# Supplementary material for: Do acute myocardial infarction and stroke mortality vary by distance to hospitals in Switzerland? Results from the Swiss National Cohort Study
Source: PubMed Central journal article supplement — BMJ Open. 2016 Nov 1;6(11):e013090. doi: 10.1136/bmjopen-2016-013090 (PMC5129138; doi:10.1136/bmjopen-2016-013090), 2016-11-01
Supplement: bmjopen-2016-013090supp_appendix13.pdf [file bmjopen-2016-013090supp_appendix13.pdf]

Appendix 13 Results of the Cox proportional hazard model analyses of stroke mortality - driving time quintiles for male persons 65 and older under models 1 to 3 for the four different hospital types

| Driving time                  | Model 1      |                   | Model 2      |                   | Model 3      |                |
|-------------------------------|--------------|-------------------|--------------|-------------------|--------------|----------------|
|                               | Hazard ratio | 95% CI            | Hazard ratio | 95% CI            | Hazard ratio | 95% CI         |
| <b>Acute hospital</b>         |              | <b>p=0.003</b>    |              | <b>p=0.159</b>    |              | <b>p=0.202</b> |
| Lowest quintile               | 1            |                   | 1            |                   | 1            |                |
| Second quintile               | 0.997        | 0.932 - 1.067     | 0.980        | 0.915 - 1.049     | 0.979        | 0.915 - 1.048  |
| Third quintile                | 1.096        | 1.024 - 1.172     | 1.063        | 0.993 - 1.138     | 1.062        | 0.988 - 1.141  |
| Fourth quintile               | 1.084        | 1.011 - 1.162     | 1.035        | 0.965 - 1.110     | 1.026        | 0.950 - 1.108  |
| Highest quintile              | 1.094        | 1.023 - 1.171     | 1.032        | 0.964 - 1.106     | 0.996        | 0.920 - 1.079  |
| <b>Acute hospital with ER</b> |              | <b>p=0.033</b>    |              | <b>p=0.538</b>    |              | <b>p=0.667</b> |
| Lowest quintile               | 1            |                   | 1            |                   | 1            |                |
| Second quintile               | 1.020        | 0.954 - 1.092     | 1.011        | 0.945 - 1.082     | 1.008        | 0.942 - 1.079  |
| Third quintile                | 1.071        | 1.000 - 1.147     | 1.048        | 0.979 - 1.123     | 1.044        | 0.971 - 1.122  |
| Fourth quintile               | 1.089        | 1.016 - 1.168     | 1.048        | 0.977 - 1.124     | 1.035        | 0.959 - 1.116  |
| Highest quintile              | 1.091        | 1.020 - 1.167     | 1.042        | 0.973 - 1.115     | 0.999        | 0.924 - 1.080  |
| <b>Central hospital</b>       |              | <b>p&lt;0.001</b> |              | <b>p&lt;0.001</b> |              | <b>p=0.007</b> |
| Lowest quintile               | 1            |                   | 1            |                   | 1            |                |
| Second quintile               | 1.016        | 0.947 - 1.089     | 0.993        | 0.926 - 1.066     | 0.992        | 0.918 - 1.072  |
| Third quintile                | 1.085        | 1.011 - 1.165     | 1.046        | 0.974 - 1.124     | 1.039        | 0.960 - 1.125  |
| Fourth quintile               | 1.133        | 1.059 - 1.213     | 1.110        | 1.035 - 1.189     | 1.098        | 1.018 - 1.185  |
| Highest quintile              | 1.164        | 1.090 - 1.243     | 1.142        | 1.068 - 1.221     | 1.119        | 1.033 - 1.212  |
| <b>University hospital</b>    |              | <b>p&lt;0.001</b> |              | <b>p=0.001</b>    |              | <b>p=0.065</b> |
| Lowest quintile               | 1            |                   | 1            |                   | 1            |                |
| Second quintile               | 1.098        | 1.023 - 1.179     | 1.073        | 0.999 - 1.153     | 1.078        | 0.998 - 1.165  |
| Third quintile                | 1.200        | 1.121 - 1.286     | 1.143        | 1.066 - 1.226     | 1.117        | 1.037 - 1.203  |
| Fourth quintile               | 1.158        | 1.083 - 1.239     | 1.103        | 1.030 - 1.182     | 1.066        | 0.988 - 1.150  |
| Highest quintile              | 1.122        | 1.049 - 1.200     | 1.129        | 1.049 - 1.214     | 1.076        | 0.991 - 1.167  |
