# Supplementary material for: Do acute myocardial infarction and stroke mortality vary by distance to hospitals in Switzerland? Results from the Swiss National Cohort Study
Source: PubMed Central journal article supplement — BMJ Open. 2016 Nov 1;6(11):e013090. doi: 10.1136/bmjopen-2016-013090 (PMC5129138; doi:10.1136/bmjopen-2016-013090), 2016-11-01
Supplement: bmjopen-2016-013090supp_appendix14.pdf [file bmjopen-2016-013090supp_appendix14.pdf]

Appendix 14 Results of the Cox proportional hazard model analyses of AMI mortality - straight-line distance quintiles for female persons 30-64 years under models 1 to 3 for the four different hospital types

| Straight-line distance        | Model 1      |                | Model 2      |                | Model 3      |                |
|-------------------------------|--------------|----------------|--------------|----------------|--------------|----------------|
|                               | Hazard ratio | 95% CI         | Hazard ratio | 95% CI         | Hazard ratio | 95% CI         |
| <b>Acute hospital</b>         |              | <b>p=0.199</b> |              | <b>p=0.386</b> |              | <b>p=0.828</b> |
| Lowest quintile               | 1            |                | 1            |                | 1            |                |
| Second quintile               | 1.066        | 0.848 - 1.341  | 1.063        | 0.845 - 1.337  | 1.062        | 0.843 - 1.337  |
| Third quintile                | 0.960        | 0.760 - 1.213  | 0.967        | 0.764 - 1.223  | 0.984        | 0.769 - 1.260  |
| Fourth quintile               | 0.981        | 0.776 - 1.239  | 0.983        | 0.775 - 1.246  | 0.992        | 0.766 - 1.285  |
| Highest quintile              | 1.223        | 0.977 - 1.529  | 1.182        | 0.940 - 1.485  | 1.110        | 0.853 - 1.444  |
| <b>Acute hospital with ER</b> |              | <b>p=0.069</b> |              | <b>p=0.136</b> |              | <b>p=0.388</b> |
| Lowest quintile               | 1            |                | 1            |                | 1            |                |
| Second quintile               | 1.009        | 0.801 - 1.270  | 1.013        | 0.804 - 1.276  | 1.018        | 0.808 - 1.283  |
| Third quintile                | 1.034        | 0.824 - 1.298  | 1.056        | 0.840 - 1.328  | 1.078        | 0.848 - 1.370  |
| Fourth quintile               | 0.873        | 0.687 - 1.109  | 0.881        | 0.691 - 1.122  | 0.882        | 0.680 - 1.145  |
| Highest quintile              | 1.223        | 0.980 - 1.527  | 1.195        | 0.953 - 1.498  | 1.104        | 0.855 - 1.425  |
| <b>Central hospital</b>       |              | <b>p=0.056</b> |              | <b>p=0.138</b> |              | <b>p=0.362</b> |
| Lowest quintile               | 1            |                | 1            |                | 1            |                |
| Second quintile               | 0.917        | 0.720 - 1.168  | 0.954        | 0.747 - 1.219  | 1.027        | 0.787 - 1.340  |
| Third quintile                | 1.143        | 0.906 - 1.443  | 1.161        | 0.914 - 1.475  | 1.186        | 0.910 - 1.545  |
| Fourth quintile               | 1.255        | 0.999 - 1.576  | 1.253        | 0.990 - 1.585  | 1.224        | 0.946 - 1.583  |
| Highest quintile              | 1.166        | 0.924 - 1.471  | 1.140        | 0.898 - 1.449  | 1.042        | 0.799 - 1.360  |
| <b>University hospital</b>    |              | <b>p=0.006</b> |              | <b>p=0.072</b> |              | <b>p=0.730</b> |
| Lowest quintile               | 1            |                | 1            |                | 1            |                |
| Second quintile               | 1.000        | 0.782 - 1.279  | 1.033        | 0.803 - 1.329  | 1.091        | 0.831 - 1.432  |
| Third quintile                | 1.233        | 0.972 - 1.564  | 1.204        | 0.943 - 1.537  | 1.154        | 0.894 - 1.490  |
| Fourth quintile               | 1.349        | 1.067 - 1.705  | 1.265        | 0.993 - 1.611  | 1.164        | 0.895 - 1.514  |
| Highest quintile              | 1.385        | 1.099 - 1.746  | 1.361        | 1.057 - 1.753  | 1.200        | 0.914 - 1.575  |
