# Supplementary material for: Do acute myocardial infarction and stroke mortality vary by distance to hospitals in Switzerland? Results from the Swiss National Cohort Study
Source: PubMed Central journal article supplement — BMJ Open. 2016 Nov 1;6(11):e013090. doi: 10.1136/bmjopen-2016-013090 (PMC5129138; doi:10.1136/bmjopen-2016-013090), 2016-11-01
Supplement: bmjopen-2016-013090supp_appendix15.pdf [file bmjopen-2016-013090supp_appendix15.pdf]

Appendix 15 Results of the Cox proportional hazard model analyses of AMI mortality - straight-line distance quintiles for male persons 30-64 years under models 1 to 3 for the four different hospital types

| Straight-line distance        | Model 1      |                   | Model 2      |                   | Model 3      |                   |
|-------------------------------|--------------|-------------------|--------------|-------------------|--------------|-------------------|
|                               | Hazard ratio | 95% CI            | Hazard ratio | 95% CI            | Hazard ratio | 95% CI            |
| <b>Acute hospital</b>         |              | <b>p=0.046</b>    |              | <b>p=0.123</b>    |              | <b>p=0.231</b>    |
| Lowest quintile               | 1            |                   | 1            |                   | 1            |                   |
| Second quintile               | 0.959        | 0.857 - 1.072     | 0.948        | 0.847 - 1.060     | 0.956        | 0.854 - 1.070     |
| Third quintile                | 0.939        | 0.840 - 1.049     | 0.938        | 0.839 - 1.048     | 0.974        | 0.866 - 1.096     |
| Fourth quintile               | 1.058        | 0.950 - 1.177     | 1.052        | 0.943 - 1.172     | 1.082        | 0.960 - 1.219     |
| Highest quintile              | 1.076        | 0.966 - 1.198     | 1.040        | 0.933 - 1.160     | 1.000        | 0.882 - 1.134     |
| <b>Acute hospital with ER</b> |              | <b>p=0.017</b>    |              | <b>p=0.065</b>    |              | <b>p=0.256</b>    |
| Lowest quintile               | 1            |                   | 1            |                   | 1            |                   |
| Second quintile               | 0.954        | 0.853 - 1.067     | 0.950        | 0.849 - 1.062     | 0.961        | 0.859 - 1.075     |
| Third quintile                | 0.930        | 0.832 - 1.039     | 0.939        | 0.840 - 1.050     | 0.978        | 0.870 - 1.100     |
| Fourth quintile               | 1.056        | 0.949 - 1.175     | 1.056        | 0.948 - 1.176     | 1.085        | 0.964 - 1.221     |
| Highest quintile              | 1.089        | 0.979 - 1.212     | 1.063        | 0.953 - 1.184     | 1.019        | 0.901 - 1.152     |
| <b>Central hospital</b>       |              | <b>p&lt;0.001</b> |              | <b>p&lt;0.001</b> |              | <b>p&lt;0.001</b> |
| Lowest quintile               | 1            |                   | 1            |                   | 1            |                   |
| Second quintile               | 1.003        | 0.893 - 1.126     | 1.032        | 0.918 - 1.160     | 1.139        | 1.002 - 1.295     |
| Third quintile                | 1.201        | 1.074 - 1.342     | 1.216        | 1.085 - 1.363     | 1.281        | 1.128 - 1.454     |
| Fourth quintile               | 1.242        | 1.112 - 1.388     | 1.245        | 1.111 - 1.395     | 1.259        | 1.111 - 1.426     |
| Highest quintile              | 1.184        | 1.058 - 1.325     | 1.178        | 1.050 - 1.321     | 1.136        | 0.999 - 1.291     |
| <b>University hospital</b>    |              | <b>p&lt;0.001</b> |              | <b>p&lt;0.001</b> |              | <b>p=0.002</b>    |
| Lowest quintile               | 1            |                   | 1            |                   | 1            |                   |
| Second quintile               | 1.005        | 0.893 - 1.130     | 1.027        | 0.911 - 1.158     | 1.093        | 0.960 - 1.245     |
| Third quintile                | 1.234        | 1.102 - 1.382     | 1.230        | 1.096 - 1.381     | 1.204        | 1.066 - 1.360     |
| Fourth quintile               | 1.347        | 1.205 - 1.506     | 1.314        | 1.172 - 1.474     | 1.261        | 1.112 - 1.429     |
| Highest quintile              | 1.307        | 1.168 - 1.463     | 1.316        | 1.165 - 1.487     | 1.227        | 1.075 - 1.399     |
