# Supplementary material for: Do acute myocardial infarction and stroke mortality vary by distance to hospitals in Switzerland? Results from the Swiss National Cohort Study
Source: PubMed Central journal article supplement — BMJ Open. 2016 Nov 1;6(11):e013090. doi: 10.1136/bmjopen-2016-013090 (PMC5129138; doi:10.1136/bmjopen-2016-013090), 2016-11-01
Supplement: bmjopen-2016-013090supp_appendix16.pdf [file bmjopen-2016-013090supp_appendix16.pdf]

Appendix 16 Results of the Cox proportional hazard model analyses of AMI mortality - straight-line distance quintiles for female persons 65 and older under models 1 to 3 for the four different hospital types

| Straight-line distance        | Model 1      |                   | Model 2      |                   | Model 3      |                |
|-------------------------------|--------------|-------------------|--------------|-------------------|--------------|----------------|
|                               | Hazard ratio | 95% CI            | Hazard ratio | 95% CI            | Hazard ratio | 95% CI         |
| <b>Acute hospital</b>         |              | <b>p&lt;0.001</b> |              | <b>p=0.001</b>    |              | <b>p=0.003</b> |
| Lowest quintile               | 1            |                   | 1            |                   | 1            |                |
| Second quintile               | 1.028        | 0.960 - 1.102     | 1.023        | 0.954 - 1.096     | 1.018        | 0.950 - 1.092  |
| Third quintile                | 1.107        | 1.030 - 1.189     | 1.085        | 1.009 - 1.167     | 1.081        | 1.001 - 1.167  |
| Fourth quintile               | 1.192        | 1.108 - 1.282     | 1.150        | 1.068 - 1.238     | 1.140        | 1.050 - 1.237  |
| Highest quintile              | 1.083        | 1.008 - 1.165     | 1.029        | 0.956 - 1.108     | 0.999        | 0.917 - 1.090  |
| <b>Acute hospital with ER</b> |              | <b>p=0.005</b>    |              | <b>p=0.185</b>    |              | <b>p=0.439</b> |
| Lowest quintile               | 1            |                   | 1            |                   | 1            |                |
| Second quintile               | 1.032        | 0.963 - 1.106     | 1.027        | 0.959 - 1.101     | 1.022        | 0.953 - 1.096  |
| Third quintile                | 1.073        | 0.998 - 1.153     | 1.057        | 0.982 - 1.136     | 1.047        | 0.969 - 1.130  |
| Fourth quintile               | 1.132        | 1.051 - 1.219     | 1.094        | 1.015 - 1.179     | 1.076        | 0.991 - 1.168  |
| Highest quintile              | 1.104        | 1.028 - 1.186     | 1.053        | 0.979 - 1.132     | 1.017        | 0.935 - 1.105  |
| <b>Central hospital</b>       |              | <b>p&lt;0.001</b> |              | <b>p&lt;0.001</b> |              | <b>p=0.003</b> |
| Lowest quintile               | 1            |                   | 1            |                   | 1            |                |
| Second quintile               | 0.969        | 0.900 - 1.043     | 0.953        | 0.884 - 1.027     | 0.933        | 0.860 - 1.013  |
| Third quintile                | 1.043        | 0.968 - 1.123     | 0.996        | 0.923 - 1.075     | 0.962        | 0.884 - 1.047  |
| Fourth quintile               | 1.055        | 0.982 - 1.133     | 1.008        | 0.937 - 1.085     | 0.975        | 0.899 - 1.057  |
| Highest quintile              | 1.180        | 1.103 - 1.262     | 1.132        | 1.056 - 1.213     | 1.085        | 1.002 - 1.174  |
| <b>University hospital</b>    |              | <b>p&lt;0.001</b> |              | <b>p&lt;0.001</b> |              | <b>p=0.023</b> |
| Lowest quintile               | 1            |                   | 1            |                   | 1            |                |
| Second quintile               | 1.105        | 1.024 - 1.193     | 1.080        | 1.000 - 1.168     | 1.084        | 0.996 - 1.180  |
| Third quintile                | 1.095        | 1.018 - 1.179     | 1.051        | 0.975 - 1.132     | 1.027        | 0.949 - 1.111  |
| Fourth quintile               | 1.221        | 1.138 - 1.309     | 1.166        | 1.085 - 1.252     | 1.131        | 1.045 - 1.224  |
| Highest quintile              | 1.167        | 1.089 - 1.251     | 1.120        | 1.036 - 1.211     | 1.073        | 0.986 - 1.169  |
