# Supplementary material for: Do acute myocardial infarction and stroke mortality vary by distance to hospitals in Switzerland? Results from the Swiss National Cohort Study
Source: PubMed Central journal article supplement — BMJ Open. 2016 Nov 1;6(11):e013090. doi: 10.1136/bmjopen-2016-013090 (PMC5129138; doi:10.1136/bmjopen-2016-013090), 2016-11-01
Supplement: bmjopen-2016-013090supp_appendix17.pdf [file bmjopen-2016-013090supp_appendix17.pdf]

Appendix 17 Results of the Cox proportional hazard model analyses of AMI mortality - straight-line distance quintiles for male persons 65 and older under models 1 to 3 for the four different hospital types

| Straight-line distance        | Model 1      |                   | Model 2      |                   | Model 3      |                   |
|-------------------------------|--------------|-------------------|--------------|-------------------|--------------|-------------------|
|                               | Hazard ratio | 95% CI            | Hazard ratio | 95% CI            | Hazard ratio | 95% CI            |
| <b>Acute hospital</b>         |              | <b>p&lt;0.001</b> |              | <b>p&lt;0.001</b> |              | <b>p=0.001</b>    |
| Lowest quintile               | 1            |                   | 1            |                   | 1            |                   |
| Second quintile               | 1.127        | 1.051 - 1.207     | 1.106        | 1.032 - 1.186     | 1.108        | 1.033 - 1.188     |
| Third quintile                | 1.163        | 1.084 - 1.247     | 1.120        | 1.044 - 1.201     | 1.133        | 1.053 - 1.221     |
| Fourth quintile               | 1.231        | 1.147 - 1.321     | 1.161        | 1.081 - 1.247     | 1.172        | 1.084 - 1.268     |
| Highest quintile              | 1.237        | 1.154 - 1.325     | 1.141        | 1.064 - 1.224     | 1.124        | 1.036 - 1.219     |
| <b>Acute hospital with ER</b> |              | <b>p&lt;0.001</b> |              | <b>p=0.003</b>    |              | <b>p=0.041</b>    |
| Lowest quintile               | 1            |                   | 1            |                   | 1            |                   |
| Second quintile               | 1.097        | 1.024 - 1.176     | 1.083        | 1.011 - 1.161     | 1.083        | 1.010 - 1.160     |
| Third quintile                | 1.109        | 1.034 - 1.190     | 1.081        | 1.008 - 1.160     | 1.088        | 1.011 - 1.172     |
| Fourth quintile               | 1.173        | 1.093 - 1.259     | 1.115        | 1.038 - 1.197     | 1.116        | 1.032 - 1.206     |
| Highest quintile              | 1.221        | 1.140 - 1.306     | 1.143        | 1.067 - 1.224     | 1.114        | 1.030 - 1.206     |
| <b>Central hospital</b>       |              | <b>p&lt;0.001</b> |              | <b>p&lt;0.001</b> |              | <b>p=0.036</b>    |
| Lowest quintile               | 1            |                   | 1            |                   | 1            |                   |
| Second quintile               | 1.050        | 0.978 - 1.126     | 1.020        | 0.950 - 1.095     | 1.031        | 0.954 - 1.114     |
| Third quintile                | 1.077        | 1.002 - 1.157     | 1.008        | 0.937 - 1.085     | 0.992        | 0.914 - 1.075     |
| Fourth quintile               | 1.182        | 1.104 - 1.266     | 1.110        | 1.035 - 1.191     | 1.081        | 1.001 - 1.168     |
| Highest quintile              | 1.199        | 1.121 - 1.282     | 1.139        | 1.064 - 1.219     | 1.088        | 1.006 - 1.176     |
| <b>University hospital</b>    |              | <b>p&lt;0.001</b> |              | <b>p&lt;0.001</b> |              | <b>p&lt;0.001</b> |
| Lowest quintile               | 1            |                   | 1            |                   | 1            |                   |
| Second quintile               | 1.088        | 1.010 - 1.171     | 1.051        | 0.975 - 1.133     | 1.068        | 0.985 - 1.159     |
| Third quintile                | 1.224        | 1.141 - 1.314     | 1.154        | 1.074 - 1.239     | 1.131        | 1.048 - 1.219     |
| Fourth quintile               | 1.324        | 1.236 - 1.417     | 1.233        | 1.150 - 1.322     | 1.199        | 1.110 - 1.294     |
| Highest quintile              | 1.294        | 1.208 - 1.385     | 1.218        | 1.131 - 1.313     | 1.168        | 1.077 - 1.267     |
