# Supplementary material for: Do acute myocardial infarction and stroke mortality vary by distance to hospitals in Switzerland? Results from the Swiss National Cohort Study
Source: PubMed Central journal article supplement — BMJ Open. 2016 Nov 1;6(11):e013090. doi: 10.1136/bmjopen-2016-013090 (PMC5129138; doi:10.1136/bmjopen-2016-013090), 2016-11-01
Supplement: bmjopen-2016-013090supp_appendix18.pdf [file bmjopen-2016-013090supp_appendix18.pdf]

Appendix 18 Results of the Cox proportional hazard model analyses of stroke mortality - straight-line distance quintiles for female persons 30-64 years under models 1 to 3 for the four different hospital types

| Straight-line distance        | Model 1      |                | Model 2      |                | Model 3      |                |
|-------------------------------|--------------|----------------|--------------|----------------|--------------|----------------|
|                               | Hazard ratio | 95% CI         | Hazard ratio | 95% CI         | Hazard ratio | 95% CI         |
| <b>Acute hospital</b>         |              | <b>p=0.149</b> |              | <b>p=0.181</b> |              | <b>p=0.066</b> |
| Lowest quintile               | 1            |                | 1            |                | 1            |                |
| Second quintile               | 1.114        | 0.899 - 1.380  | 1.114        | 0.899 - 1.381  | 1.131        | 0.912 - 1.404  |
| Third quintile                | 1.074        | 0.866 - 1.331  | 1.089        | 0.877 - 1.352  | 1.165        | 0.927 - 1.462  |
| Fourth quintile               | 1.280        | 1.040 - 1.574  | 1.290        | 1.045 - 1.592  | 1.407        | 1.116 - 1.775  |
| Highest quintile              | 1.205        | 0.975 - 1.489  | 1.175        | 0.947 - 1.458  | 1.264        | 0.987 - 1.619  |
| <b>Acute hospital with ER</b> |              | <b>p=0.011</b> |              | <b>p=0.014</b> |              | <b>p=0.003</b> |
| Lowest quintile               | 1            |                | 1            |                | 1            |                |
| Second quintile               | 1.030        | 0.830 - 1.278  | 1.035        | 0.834 - 1.284  | 1.052        | 0.847 - 1.307  |
| Third quintile                | 0.988        | 0.796 - 1.226  | 1.009        | 0.812 - 1.253  | 1.082        | 0.862 - 1.359  |
| Fourth quintile               | 1.336        | 1.091 - 1.635  | 1.351        | 1.100 - 1.659  | 1.479        | 1.181 - 1.853  |
| Highest quintile              | 1.168        | 0.946 - 1.441  | 1.140        | 0.921 - 1.413  | 1.226        | 0.963 - 1.561  |
| <b>Central hospital</b>       |              | <b>p=0.958</b> |              | <b>p=0.897</b> |              | <b>p=0.694</b> |
| Lowest quintile               | 1            |                | 1            |                | 1            |                |
| Second quintile               | 0.958        | 0.779 - 1.179  | 0.983        | 0.797 - 1.213  | 1.032        | 0.818 - 1.300  |
| Third quintile                | 1.039        | 0.846 - 1.276  | 1.038        | 0.840 - 1.283  | 1.065        | 0.841 - 1.348  |
| Fourth quintile               | 1.012        | 0.823 - 1.246  | 0.990        | 0.800 - 1.226  | 0.993        | 0.786 - 1.255  |
| Highest quintile              | 0.995        | 0.807 - 1.226  | 0.930        | 0.750 - 1.153  | 0.905        | 0.712 - 1.151  |
| <b>University hospital</b>    |              | <b>p=0.728</b> |              | <b>p=0.906</b> |              | <b>p=0.735</b> |
| Lowest quintile               | 1            |                | 1            |                | 1            |                |
| Second quintile               | 1.051        | 0.853 - 1.296  | 1.069        | 0.863 - 1.325  | 1.130        | 0.895 - 1.428  |
| Third quintile                | 1.076        | 0.872 - 1.329  | 1.044        | 0.841 - 1.297  | 1.047        | 0.834 - 1.314  |
| Fourth quintile               | 1.159        | 0.941 - 1.427  | 1.096        | 0.884 - 1.359  | 1.089        | 0.862 - 1.377  |
| Highest quintile              | 1.082        | 0.877 - 1.336  | 1.006        | 0.794 - 1.273  | 0.977        | 0.759 - 1.259  |
