# Supplementary material for: Do acute myocardial infarction and stroke mortality vary by distance to hospitals in Switzerland? Results from the Swiss National Cohort Study
Source: PubMed Central journal article supplement — BMJ Open. 2016 Nov 1;6(11):e013090. doi: 10.1136/bmjopen-2016-013090 (PMC5129138; doi:10.1136/bmjopen-2016-013090), 2016-11-01
Supplement: bmjopen-2016-013090supp_appendix19.pdf [file bmjopen-2016-013090supp_appendix19.pdf]

Appendix 19 Results of the Cox proportional hazard model analyses of stroke mortality - straight-line distance quintiles for male persons 30-64 years under models 1 to 3 for the four different hospital types

| Straight-line distance        | Model 1      |                | Model 2      |                | Model 3      |                |
|-------------------------------|--------------|----------------|--------------|----------------|--------------|----------------|
|                               | Hazard ratio | 95% CI         | Hazard ratio | 95% CI         | Hazard ratio | 95% CI         |
| <b>Acute hospital</b>         |              | <b>p=0.302</b> |              | <b>p=0.666</b> |              | <b>p=0.767</b> |
| Lowest quintile               | 1            |                | 1            |                | 1            |                |
| Second quintile               | 1.019        | 0.852 - 1.218  | 1.021        | 0.853 - 1.221  | 1.012        | 0.845 - 1.211  |
| Third quintile                | 0.858        | 0.714 - 1.031  | 0.896        | 0.744 - 1.077  | 0.897        | 0.739 - 1.089  |
| Fourth quintile               | 0.902        | 0.753 - 1.080  | 0.946        | 0.788 - 1.135  | 0.948        | 0.776 - 1.158  |
| Highest quintile              | 0.967        | 0.809 - 1.156  | 0.974        | 0.813 - 1.167  | 0.956        | 0.776 - 1.178  |
| <b>Acute hospital with ER</b> |              | <b>p=0.294</b> |              | <b>p=0.560</b> |              | <b>p=0.624</b> |
| Lowest quintile               | 1            |                | 1            |                | 1            |                |
| Second quintile               | 0.937        | 0.782 - 1.122  | 0.945        | 0.789 - 1.133  | 0.944        | 0.787 - 1.132  |
| Third quintile                | 0.826        | 0.687 - 0.992  | 0.866        | 0.720 - 1.041  | 0.876        | 0.722 - 1.064  |
| Fourth quintile               | 0.933        | 0.781 - 1.114  | 0.979        | 0.818 - 1.171  | 0.996        | 0.819 - 1.211  |
| Highest quintile              | 0.977        | 0.819 - 1.166  | 0.984        | 0.823 - 1.177  | 0.978        | 0.799 - 1.198  |
| <b>Central hospital</b>       |              | <b>p=0.008</b> |              | <b>p=0.049</b> |              | <b>p=0.138</b> |
| Lowest quintile               | 1            |                | 1            |                | 1            |                |
| Second quintile               | 0.767        | 0.634 - 0.929  | 0.830        | 0.684 - 1.007  | 0.860        | 0.696 - 1.062  |
| Third quintile                | 0.994        | 0.831 - 1.189  | 1.065        | 0.886 - 1.280  | 1.090        | 0.889 - 1.338  |
| Fourth quintile               | 1.019        | 0.852 - 1.219  | 1.061        | 0.882 - 1.275  | 1.070        | 0.874 - 1.309  |
| Highest quintile              | 1.055        | 0.882 - 1.261  | 1.066        | 0.888 - 1.280  | 1.039        | 0.847 - 1.274  |
| <b>University hospital</b>    |              | <b>p=0.013</b> |              | <b>p=0.024</b> |              | <b>p=0.094</b> |
| Lowest quintile               | 1            |                | 1            |                | 1            |                |
| Second quintile               | 1.033        | 0.853 - 1.250  | 1.136        | 0.934 - 1.382  | 1.208        | 0.977 - 1.493  |
| Third quintile                | 1.207        | 1.002 - 1.455  | 1.284        | 1.061 - 1.555  | 1.284        | 1.051 - 1.569  |
| Fourth quintile               | 1.131        | 0.935 - 1.368  | 1.174        | 0.966 - 1.427  | 1.157        | 0.936 - 1.430  |
| Highest quintile              | 1.324        | 1.102 - 1.591  | 1.367        | 1.117 - 1.672  | 1.303        | 1.049 - 1.617  |
