# Supplementary material for: Do acute myocardial infarction and stroke mortality vary by distance to hospitals in Switzerland? Results from the Swiss National Cohort Study
Source: PubMed Central journal article supplement — BMJ Open. 2016 Nov 1;6(11):e013090. doi: 10.1136/bmjopen-2016-013090 (PMC5129138; doi:10.1136/bmjopen-2016-013090), 2016-11-01
Supplement: bmjopen-2016-013090supp_appendix20.pdf [file bmjopen-2016-013090supp_appendix20.pdf]

Appendix 20 Results of the Cox proportional hazard model analyses of stroke mortality - straight-line distance quintiles for female persons 65 and older under models 1 to 3 for the four different hospital types

| Straight-line distance        | Model 1      |                   | Model 2      |                   | Model 3      |                   |
|-------------------------------|--------------|-------------------|--------------|-------------------|--------------|-------------------|
|                               | Hazard ratio | 95% CI            | Hazard ratio | 95% CI            | Hazard ratio | 95% CI            |
| <b>Acute hospital</b>         |              | <b>p=0.001</b>    |              | <b>p=0.294</b>    |              | <b>p=0.335</b>    |
| Lowest quintile               | 1            |                   | 1            |                   | 1            |                   |
| Second quintile               | 1.004        | 0.952 - 1.060     | 0.988        | 0.936 - 1.042     | 0.985        | 0.933 - 1.039     |
| Third quintile                | 1.091        | 1.032 - 1.153     | 1.046        | 0.989 - 1.107     | 1.045        | 0.985 - 1.109     |
| Fourth quintile               | 1.088        | 1.027 - 1.153     | 1.028        | 0.970 - 1.090     | 1.029        | 0.964 - 1.098     |
| Highest quintile              | 1.063        | 1.005 - 1.124     | 1.002        | 0.947 - 1.061     | 1.002        | 0.937 - 1.072     |
| <b>Acute hospital with ER</b> |              | <b>p=0.001</b>    |              | <b>p=0.104</b>    |              | <b>p=0.112</b>    |
| Lowest quintile               | 1            |                   | 1            |                   | 1            |                   |
| Second quintile               | 0.990        | 0.938 - 1.045     | 0.981        | 0.929 - 1.035     | 0.979        | 0.927 - 1.033     |
| Third quintile                | 1.082        | 1.024 - 1.145     | 1.054        | 0.997 - 1.115     | 1.055        | 0.995 - 1.119     |
| Fourth quintile               | 1.086        | 1.025 - 1.151     | 1.036        | 0.977 - 1.098     | 1.039        | 0.974 - 1.108     |
| Highest quintile              | 1.046        | 0.990 - 1.106     | 1.003        | 0.948 - 1.061     | 1.003        | 0.939 - 1.071     |
| <b>Central hospital</b>       |              | <b>p&lt;0.001</b> |              | <b>p&lt;0.001</b> |              | <b>p&lt;0.001</b> |
| Lowest quintile               | 1            |                   | 1            |                   | 1            |                   |
| Second quintile               | 1.118        | 1.056 - 1.183     | 1.073        | 1.014 - 1.137     | 1.092        | 1.026 - 1.163     |
| Third quintile                | 1.126        | 1.062 - 1.193     | 1.065        | 1.004 - 1.130     | 1.091        | 1.022 - 1.166     |
| Fourth quintile               | 1.147        | 1.085 - 1.212     | 1.103        | 1.042 - 1.168     | 1.128        | 1.059 - 1.201     |
| Highest quintile              | 1.139        | 1.079 - 1.202     | 1.129        | 1.068 - 1.193     | 1.156        | 1.085 - 1.232     |
| <b>University hospital</b>    |              | <b>p&lt;0.001</b> |              | <b>p=0.002</b>    |              | <b>p=0.003</b>    |
| Lowest quintile               | 1            |                   | 1            |                   | 1            |                   |
| Second quintile               | 1.141        | 1.075 - 1.210     | 1.085        | 1.022 - 1.151     | 1.099        | 1.029 - 1.174     |
| Third quintile                | 1.179        | 1.116 - 1.247     | 1.118        | 1.056 - 1.183     | 1.121        | 1.056 - 1.191     |
| Fourth quintile               | 1.137        | 1.076 - 1.202     | 1.081        | 1.021 - 1.143     | 1.085        | 1.020 - 1.155     |
| Highest quintile              | 1.079        | 1.022 - 1.140     | 1.060        | 0.997 - 1.127     | 1.059        | 0.990 - 1.132     |
