# Supplementary material for: Do acute myocardial infarction and stroke mortality vary by distance to hospitals in Switzerland? Results from the Swiss National Cohort Study
Source: PubMed Central journal article supplement — BMJ Open. 2016 Nov 1;6(11):e013090. doi: 10.1136/bmjopen-2016-013090 (PMC5129138; doi:10.1136/bmjopen-2016-013090), 2016-11-01
Supplement: bmjopen-2016-013090supp_appendix21.pdf [file bmjopen-2016-013090supp_appendix21.pdf]

Appendix 21 Results of the Cox proportional hazard model analyses of stroke mortality - straight-line distance quintiles for male persons 65 and older under models 1 to 3 for the four different hospital types

| Straight-line distance        | Model 1      |                   | Model 2      |                   | Model 3      |                |
|-------------------------------|--------------|-------------------|--------------|-------------------|--------------|----------------|
|                               | Hazard ratio | 95% CI            | Hazard ratio | 95% CI            | Hazard ratio | 95% CI         |
| <b>Acute hospital</b>         |              | <b>p&lt;0.001</b> |              | <b>p=0.120</b>    |              | <b>p=0.377</b> |
| Lowest quintile               | 1            |                   | 1            |                   | 1            |                |
| Second quintile               | 1.069        | 0.999 - 1.143     | 1.052        | 0.983 - 1.126     | 1.050        | 0.981 - 1.124  |
| Third quintile                | 1.098        | 1.025 - 1.177     | 1.064        | 0.993 - 1.140     | 1.061        | 0.987 - 1.141  |
| Fourth quintile               | 1.140        | 1.064 - 1.222     | 1.089        | 1.015 - 1.169     | 1.078        | 0.997 - 1.165  |
| Highest quintile              | 1.147        | 1.072 - 1.227     | 1.083        | 1.011 - 1.160     | 1.050        | 0.969 - 1.138  |
| <b>Acute hospital with ER</b> |              | <b>p&lt;0.001</b> |              | <b>p=0.023</b>    |              | <b>p=0.095</b> |
| Lowest quintile               | 1            |                   | 1            |                   | 1            |                |
| Second quintile               | 1.042        | 0.974 - 1.115     | 1.033        | 0.965 - 1.105     | 1.031        | 0.963 - 1.103  |
| Third quintile                | 1.030        | 0.961 - 1.104     | 1.009        | 0.941 - 1.081     | 1.005        | 0.934 - 1.081  |
| Fourth quintile               | 1.158        | 1.081 - 1.241     | 1.111        | 1.037 - 1.191     | 1.097        | 1.016 - 1.184  |
| Highest quintile              | 1.107        | 1.035 - 1.184     | 1.059        | 0.989 - 1.134     | 1.024        | 0.947 - 1.107  |
| <b>Central hospital</b>       |              | <b>p&lt;0.001</b> |              | <b>p&lt;0.001</b> |              | <b>p=0.005</b> |
| Lowest quintile               | 1            |                   | 1            |                   | 1            |                |
| Second quintile               | 1.031        | 0.961 - 1.106     | 1.003        | 0.934 - 1.076     | 1.005        | 0.930 - 1.086  |
| Third quintile                | 1.107        | 1.032 - 1.188     | 1.061        | 0.988 - 1.140     | 1.053        | 0.972 - 1.141  |
| Fourth quintile               | 1.148        | 1.072 - 1.228     | 1.116        | 1.041 - 1.196     | 1.103        | 1.021 - 1.191  |
| Highest quintile              | 1.171        | 1.096 - 1.251     | 1.155        | 1.079 - 1.236     | 1.128        | 1.044 - 1.219  |
| <b>University hospital</b>    |              | <b>p&lt;0.001</b> |              | <b>p=0.001</b>    |              | <b>p=0.076</b> |
| Lowest quintile               | 1            |                   | 1            |                   | 1            |                |
| Second quintile               | 1.074        | 1.000 - 1.154     | 1.041        | 0.968 - 1.119     | 1.039        | 0.960 - 1.125  |
| Third quintile                | 1.187        | 1.109 - 1.271     | 1.136        | 1.060 - 1.217     | 1.109        | 1.031 - 1.193  |
| Fourth quintile               | 1.173        | 1.096 - 1.254     | 1.118        | 1.044 - 1.197     | 1.081        | 1.002 - 1.166  |
| Highest quintile              | 1.111        | 1.039 - 1.189     | 1.115        | 1.036 - 1.201     | 1.066        | 0.984 - 1.156  |
