# Supplementary figures and images for: Do acute myocardial infarction and stroke mortality vary by distance to hospitals in Switzerland? Results from the Swiss National Cohort Study
Source: PubMed Central journal article supplement — BMJ Open. 2016 Nov 1;6(11):e013090. doi: 10.1136/bmjopen-2016-013090 (PMC5129138; doi:10.1136/bmjopen-2016-013090), 2016-11-01

Driving time to university hospital (quintiles)

- 1
  - 2
  - 3
  - 4
  - 5
- + University hospitals
- Lakes

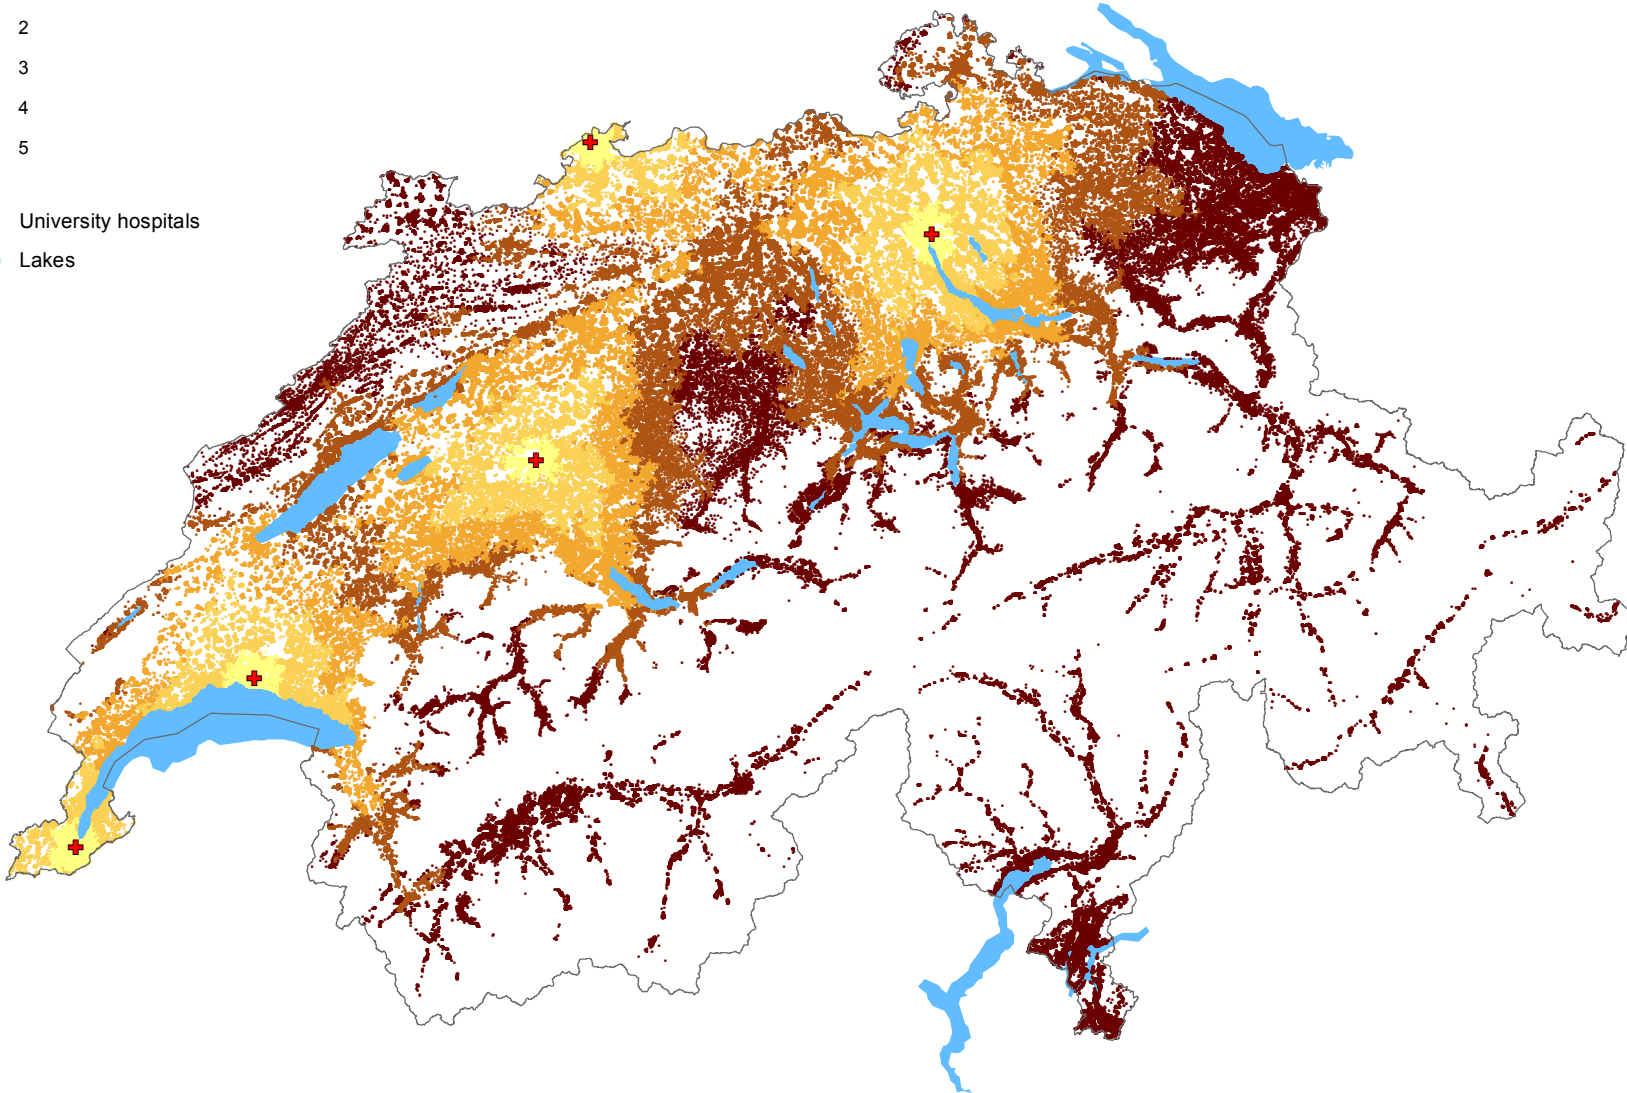

Supplement: bmjopen-2016-013090supp_appendix3.pdf [file bmjopen-2016-013090supp_appendix3.pdf]
